# Supplementary material for: Regional Climate Change in Southeast Mexico-Yucatan Peninsula, Central America and the Caribbean
Source: MDPI journal article supplement (doi:10.3390/app11188284), 2021-09-07
Supplement: s1 [file s1]

**Table S1.** Equation (1) applied to the trends of the CRU data and RCP scenario. In both cases, the time period is 25 years, 1991-2015 for CRU data, 2015-2039, and 2075-2099 for RCPs. The results in bold correspond to the significative difference (for details see S2-S5 of supplementary material .

| Data              | 1             | 2             | 3             | 4            | 5            | 6             | 7             | 8             | 9             | 10            | 11            | 12            | 13            | 14            | 15            | 16            | 17            |
|-------------------|---------------|---------------|---------------|--------------|--------------|---------------|---------------|---------------|---------------|---------------|---------------|---------------|---------------|---------------|---------------|---------------|---------------|
| Z (Tmp 2015-2039) |               |               |               |              |              |               |               |               |               |               |               |               |               |               |               |               |               |
| RCP4.5            | 1.662         | -0.441        | 1.387         | 1.675        | <b>2.577</b> | -0.317        | -0.580        | -0.731        | 0.504         | -0.380        | 1.292         | -0.043        | -1.069        | <b>-3.415</b> | <b>-2.554</b> | <b>-2.450</b> | -1.763        |
| RCP6.0            | 0.722         | -0.086        | 1.849         | <b>2.274</b> | <b>3.035</b> | 1.146         | 0.855         | -0.303        | 0.338         | 0.098         | 0.912         | 0.156         | -0.830        | <b>-2.853</b> | <b>-1.943</b> | -1.477        | -1.040        |
| RCP8.5            | 0.134         | -1.090        | 0.320         | 1.091        | 1.906        | -1.474        | -0.887        | <b>-2.558</b> | -0.304        | -1.684        | 0.113         | -1.188        | -1.824        | <b>-3.877</b> | <b>-3.481</b> | <b>-4.058</b> | <b>-2.469</b> |
| Z (Tmp 2075-2099) |               |               |               |              |              |               |               |               |               |               |               |               |               |               |               |               |               |
| RCP4.5            | <b>3.551</b>  | <b>3.166</b>  | <b>4.067</b>  | <b>4.125</b> | <b>4.660</b> | <b>1.986</b>  | 1.720         | <b>1.940</b>  | <b>2.542</b>  | 0.949         | <b>3.249</b>  | <b>2.570</b>  | 0.752         | -0.950        | -0.209        | 0.100         | 0.744         |
| RCP6.0            | 0.784         | -0.151        | 1.119         | 1.632        | <b>2.380</b> | -0.349        | -0.331        | -1.465        | -0.635        | -1.896        | -0.623        | 0.786         | -1.731        | <b>-3.283</b> | <b>-2.533</b> | <b>-3.110</b> | -1.208        |
| RCP8.5            | -1.805        | <b>-3.317</b> | -1.451        | -0.442       | 0.648        | <b>-2.984</b> | <b>-3.255</b> | <b>-6.048</b> | <b>-2.322</b> | <b>-4.419</b> | -1.751        | <b>-3.506</b> | <b>-3.169</b> | <b>-5.741</b> | <b>-4.939</b> | <b>-5.765</b> | <b>-3.806</b> |
| Z (Tmx 2015-2039) |               |               |               |              |              |               |               |               |               |               |               |               |               |               |               |               |               |
| RCP4.5            | 1.825         | 0.352         | <b>1.970</b>  | <b>2.057</b> | <b>2.517</b> | -1.359        | -1.675        | 0.163         | 0.509         | 0.827         | 1.684         | 1.462         | -1.763        | <b>-3.287</b> | <b>-3.632</b> | -1.557        | <b>-2.089</b> |
| RCP6.0            | 1.104         | 0.061         | <b>2.341</b>  | <b>2.205</b> | <b>2.688</b> | -0.689        | 0.701         | 0.401         | 0.783         | 1.535         | 1.542         | 1.328         | -1.474        | <b>-2.473</b> | <b>-2.852</b> | -0.977        | -1.636        |
| RCP8.5            | 0.809         | 0.104         | 1.204         | 1.308        | <b>2.026</b> | <b>-2.075</b> | -1.937        | -0.853        | -0.145        | -0.123        | 0.749         | 0.835         | <b>-2.587</b> | <b>-3.676</b> | <b>-4.616</b> | <b>-2.068</b> | <b>-2.813</b> |
| Z (Tmx 2075-2099) |               |               |               |              |              |               |               |               |               |               |               |               |               |               |               |               |               |
| RCP4.5            | <b>2.640</b>  | <b>3.015</b>  | <b>3.898</b>  | <b>3.483</b> | <b>4.050</b> | 0.112         | 0.857         | <b>2.193</b>  | <b>2.182</b>  | <b>2.208</b>  | <b>2.508</b>  | <b>3.284</b>  | 0.404         | -1.149        | -1.690        | 0.790         | -0.292        |
| RCP6.0            | 1.558         | 0.690         | 2.350         | 1.254        | <b>1.989</b> | -1.295        | 0.879         | -0.086        | 0.242         | 0.140         | 1.323         | <b>2.928</b>  | <b>-2.433</b> | <b>-3.730</b> | <b>-3.892</b> | -1.249        | <b>-2.059</b> |
| RCP8.5            | -0.183        | -1.927        | -0.636        | -0.210       | 0.596        | <b>-3.572</b> | <b>-2.957</b> | <b>-4.527</b> | -1.820        | -1.775        | -0.979        | -1.656        | <b>-3.749</b> | <b>-5.371</b> | <b>-6.374</b> | <b>-4.425</b> | <b>-4.156</b> |
| Z (Tmn 2015-2039) |               |               |               |              |              |               |               |               |               |               |               |               |               |               |               |               |               |
| RCP4.5            | 0.169         | -0.063        | -0.225        | 1.672        | <b>2.907</b> | 0.722         | -0.735        | <b>-2.186</b> | -1.095        | -2.061        | -0.373        | -1.907        | -0.820        | <b>-2.648</b> | -1.061        | <b>-2.354</b> | -1.068        |
| RCP6.0            | 0.243         | -0.234        | 0.189         | 1.338        | <b>2.356</b> | 1.500         | 0.764         | -1.043        | -0.738        | -1.013        | -1.396        | -1.524        | -0.251        | <b>-2.329</b> | -1.003        | -1.667        | -0.366        |
| RCP8.5            | -0.870        | -1.385        | -1.187        | 0.440        | 1.812        | 0.269         | -1.232        | <b>-2.908</b> | <b>-2.439</b> | <b>-3.595</b> | -1.768        | <b>-2.503</b> | -1.728        | -3.160        | -1.549        | <b>-3.219</b> | <b>-2.696</b> |
| Z (Tmn 2075-2099) |               |               |               |              |              |               |               |               |               |               |               |               |               |               |               |               |               |
| RCP4.5            | <b>2.335</b>  | 1.948         | <b>2.281</b>  | <b>3.637</b> | <b>4.604</b> | <b>2.216</b>  | <b>2.176</b>  | 0.664         | 1.043         | 0.370         | 1.561         | 0.730         | 0.924         | -0.606        | 1.169         | -0.176        | 1.438         |
| RCP6.0            | -1.458        | 0.456         | -1.465        | -0.061       | 1.064        | 0.151         | -0.867        | -1.909        | <b>-2.170</b> | <b>-3.208</b> | -1.582        | -1.600        | <b>-2.419</b> | <b>-2.862</b> | -0.907        | <b>-3.073</b> | -1.346        |
| RCP8.5            | <b>-2.713</b> | <b>-3.658</b> | <b>-3.275</b> | -0.825       | 0.207        | -1.094        | <b>-2.986</b> | <b>-6.393</b> | <b>-3.344</b> | <b>-5.146</b> | <b>-4.953</b> | <b>-4.873</b> | <b>-2.485</b> | <b>-5.272</b> | <b>-2.971</b> | <b>-4.677</b> | <b>-5.009</b> |
| Z (Pre 2015-2039) |               |               |               |              |              |               |               |               |               |               |               |               |               |               |               |               |               |
| RCP4.5            | 1.717         | 1.594         | 1.573         | <b>2.332</b> | <b>2.086</b> | 0.267         | -1.872        | -0.635        | 0.709         | 0.232         | 1.231         | 0.745         | 0.346         | <b>1.938</b>  | <b>2.027</b>  | 0.179         | <b>2.733</b>  |
| RCP6.0            | 1.593         | 1.769         | 1.886         | <b>2.843</b> | <b>2.844</b> | 0.108         | <b>-1.977</b> | -0.691        | 0.565         | 0.312         | 1.024         | 0.969         | 0.001         | 1.852         | 1.848         | 0.134         | <b>2.546</b>  |

|                          |              |              |               |              |               |       |        |              |              |              |              |              |              |              |              |              |              |
|--------------------------|--------------|--------------|---------------|--------------|---------------|-------|--------|--------------|--------------|--------------|--------------|--------------|--------------|--------------|--------------|--------------|--------------|
| <b>RCP8.5</b>            | 1.682        | 1.618        | <b>1.963</b>  | <b>2.636</b> | <b>2.189</b>  | 0.148 | -1.609 | -0.428       | 0.503        | 0.226        | 1.089        | 0.838        | 0.322        | 1.877        | <b>2.090</b> | 0.229        | <b>2.716</b> |
| <b>Z (Pre 2075-2099)</b> |              |              |               |              |               |       |        |              |              |              |              |              |              |              |              |              |              |
| <b>RCP4.5</b>            | 1.610        | 1.486        | 1.423         | <b>2.347</b> | <b>1.918</b>  | 0.230 | -1.883 | -0.703       | 0.744        | 0.383        | 1.169        | 0.649        | -0.170       | 1.661        | <b>1.963</b> | 0.117        | <b>2.584</b> |
| <b>RCP6.0</b>            | 1.316        | 1.425        | 1.245         | <b>2.859</b> | <b>1.965</b>  | 0.012 | -1.740 | -0.316       | 0.435        | -0.188       | 1.123        | 0.375        | 0.295        | 1.834        | <b>2.066</b> | 0.205        | <b>2.699</b> |
| <b>RCP8.5</b>            | <b>2.539</b> | <b>4.609</b> | <b>10.340</b> | <b>7.990</b> | <b>13.842</b> | 1.220 | 1.156  | <b>7.854</b> | <b>4.090</b> | <b>4.750</b> | <b>3.408</b> | <b>4.481</b> | <b>6.660</b> | <b>5.675</b> | <b>5.094</b> | <b>2.942</b> | <b>4.945</b> |

**Table S2.** Climate variable trends (Tmx) and standard errors of the 17 study points for the CRU and RCP’s projection data. Note: 1539 mean 2015-2039 period and 7599 mean 2075-2099 period.

| City Points | m(°C/yr) | std. error | m(°C/yr)   | std. error | m(°C/yr)   | std. error | m(°C/yr)   | std. error | m(°C/yr)   | std. error | m(°C/yr)   | std. error | m(°C/yr)   | std. error |
|-------------|----------|------------|------------|------------|------------|------------|------------|------------|------------|------------|------------|------------|------------|------------|
|             | TMX OBS  |            | RCP45 1539 |            | RCP45 7599 |            | RCP60 1539 |            | RCP60 7599 |            | RCP85 1539 |            | RCP85 7599 |            |
| 1           | 0.0399   | 0.0103     | 0.0199     | 0.00373    | 0.00999    | 0.00471    | 0.026      | 0.00723    | 0.021      | 0.0064     | 0.0308     | 0.00449    | 0.0421     | 0.00613    |
| 2           | 0.0393   | 0.0102     | 0.0353     | 0.00498    | 0.00364    | 0.00598    | 0.0385     | 0.00801    | 0.0299     | 0.00901    | 0.0381     | 0.00516    | 0.0637     | 0.0075     |
| 3           | 0.0494   | 0.0101     | 0.0269     | 0.00533    | 0.00667    | 0.00426    | 0.0225     | 0.00547    | 0.0229     | 0.00501    | 0.0357     | 0.00524    | 0.057      | 0.00637    |
| 4           | 0.0422   | 0.00966    | 0.0216     | 0.00263    | 0.00711    | 0.00286    | 0.0196     | 0.00342    | 0.0289     | 0.00437    | 0.0292     | 0.00232    | 0.0443     | 0.00246    |
| 5           | 0.0497   | 0.0104     | 0.0228     | 0.00245    | 0.00637    | 0.00251    | 0.0198     | 0.00394    | 0.0275     | 0.00404    | 0.028      | 0.00256    | 0.0433     | 0.00265    |
| 6           | 0.00673  | 0.00939    | 0.0197     | 0.0017     | 0.00564    | 0.00242    | 0.0135     | 0.00287    | 0.0204     | 0.00482    | 0.0271     | 0.00286    | 0.0439     | 0.00448    |
| 7           | 0.0189   | 0.00712    | 0.0327     | 0.00414    | 0.011      | 0.00585    | 0.0114     | 0.00797    | 0.00858    | 0.00933    | 0.0349     | 0.00418    | 0.0512     | 0.00828    |
| 8           | 0.0272   | 0.00717    | 0.0259     | 0.00345    | 0.00994    | 0.00324    | 0.0237     | 0.00497    | 0.0281     | 0.00755    | 0.0337     | 0.00256    | 0.0642     | 0.00392    |
| 9           | 0.036    | 0.00985    | 0.0307     | 0.00334    | 0.0129     | 0.00387    | 0.0262     | 0.0077     | 0.0327     | 0.00936    | 0.0375     | 0.00304    | 0.0563     | 0.00523    |
| 10          | 0.0316   | 0.00966    | 0.0233     | 0.00271    | 0.00844    | 0.00408    | 0.015      | 0.00485    | 0.0299     | 0.00729    | 0.0329     | 0.00417    | 0.0511     | 0.00522    |
| 11          | 0.0395   | 0.0101     | 0.0209     | 0.00447    | 0.0129     | 0.00323    | 0.022      | 0.00516    | 0.0238     | 0.00623    | 0.0314     | 0.00385    | 0.0508     | 0.00558    |
| 12          | 0.0394   | 0.00922    | 0.0247     | 0.00401    | 0.00681    | 0.00367    | 0.0256     | 0.00479    | 0.00916    | 0.00465    | 0.0308     | 0.00457    | 0.056      | 0.00392    |
| 13          | 0.00864  | 0.0088     | 0.0245     | 0.00186    | 0.00501    | 0.00173    | 0.0221     | 0.00242    | 0.0316     | 0.0034     | 0.0319     | 0.00184    | 0.0424     | 0.0019     |
| 14          | -0.00546 | 0.00942    | 0.0259     | 0.0015     | 0.00564    | 0.00214    | 0.0189     | 0.00287    | 0.0332     | 0.00432    | 0.0301     | 0.0022     | 0.0475     | 0.00291    |
| 15          | -0.00903 | 0.00913    | 0.0249     | 0.00197    | 0.00705    | 0.00267    | 0.0186     | 0.00324    | 0.0317     | 0.00511    | 0.0337     | 0.00152    | 0.0515     | 0.00261    |
| 16          | 0.00874  | 0.00688    | 0.0196     | 0.00113    | 0.00321    | 0.00128    | 0.0157     | 0.00182    | 0.0182     | 0.00316    | 0.0233     | 0.00149    | 0.0409     | 0.00234    |

**Table S3.** Climate variable trends (Tmn) and standard errors of the 17 study points for the CRU and RCP's projection data. Note: 1539 mean 2015-2039 period and 7599 mean 2075-2099 period.

| City Points | m(°C/yr) | std. error | m(°C/yr)   | std. error | m(°C/yr)   | std. error | m(°C/yr)   | std. error | m(°C/yr)   | std. error | m(°C/yr)   | std. error | m(°C/yr)   | std. error |
|-------------|----------|------------|------------|------------|------------|------------|------------|------------|------------|------------|------------|------------|------------|------------|
|             | TMN OBS  |            | RCP45 1539 |            | RCP45 7599 |            | RCP60 1539 |            | RCP60 7599 |            | RCP85 1539 |            | RCP85 7599 |            |
| 1           | 0.0262   | 0.00655    | 0.0249     | 0.004      | 0.00791    | 0.00429    | 0.0235     | 0.00896    | 0.049      | 0.0142     | 0.0335     | 0.00524    | 0.0484     | 0.0049     |
| 2           | 0.0246   | 0.00674    | 0.0251     | 0.00408    | 0.00955    | 0.00377    | 0.0265     | 0.0045     | 0.0208     | 0.0049     | 0.0352     | 0.00362    | 0.0568     | 0.00566    |
| 3           | 0.0224   | 0.00803    | 0.0243     | 0.00258    | 0.00338    | 0.00224    | 0.0207     | 0.00405    | 0.0369     | 0.00578    | 0.0326     | 0.00305    | 0.0497     | 0.00223    |
| 4           | 0.0364   | 0.00866    | 0.0213     | 0.00256    | 0.00355    | 0.00256    | 0.0228     | 0.00532    | 0.0372     | 0.00965    | 0.0324     | 0.00274    | 0.044      | 0.00314    |
| 5           | 0.0472   | 0.00931    | 0.0194     | 0.00218    | 0.00294    | 0.00239    | 0.0233     | 0.00402    | 0.035      | 0.00669    | 0.0297     | 0.00255    | 0.0452     | 0.00256    |
| 6           | 0.0327   | 0.0125     | 0.0236     | 0.00156    | 0.00477    | 0.00161    | 0.0135     | 0.00274    | 0.0307     | 0.00417    | 0.0293     | 0.00169    | 0.0468     | 0.0031     |
| 7           | 0.0189   | 0.00712    | 0.0243     | 0.00179    | 0.00283    | 0.00195    | 0.0129     | 0.00329    | 0.0263     | 0.00469    | 0.0279     | 0.00163    | 0.0424     | 0.00335    |
| 8           | 0.011    | 0.00671    | 0.0265     | 0.00229    | 0.00633    | 0.00209    | 0.0186     | 0.00284    | 0.0269     | 0.00493    | 0.0321     | 0.00276    | 0.0565     | 0.00237    |
| 9           | 0.018    | 0.00748    | 0.0265     | 0.00206    | 0.0095     | 0.00322    | 0.0245     | 0.00464    | 0.0458     | 0.0104     | 0.037      | 0.00217    | 0.0476     | 0.00473    |
| 10          | 0.00642  | 0.00857    | 0.0259     | 0.00398    | 0.00271    | 0.00518    | 0.0179     | 0.00741    | 0.054      | 0.0121     | 0.0381     | 0.00205    | 0.0552     | 0.00405    |
| 11          | 0.022    | 0.00696    | 0.0248     | 0.00279    | 0.00983    | 0.00351    | 0.0335     | 0.0044     | 0.0385     | 0.00776    | 0.0354     | 0.003      | 0.0586     | 0.00248    |
| 12          | 0.00896  | 0.0081     | 0.0248     | 0.00183    | 0.00278    | 0.00243    | 0.0219     | 0.00254    | 0.0231     | 0.00353    | 0.0299     | 0.00208    | 0.0503     | 0.00252    |
| 13          | 0.0139   | 0.00959    | 0.0219     | 0.00178    | 0.00487    | 0.00183    | 0.0165     | 0.00389    | 0.0397     | 0.00466    | 0.0309     | 0.00219    | 0.0387     | 0.00276    |
| 14          | -0.00274 | 0.00882    | 0.0213     | 0.00214    | 0.00293    | 0.00308    | 0.0184     | 0.00213    | 0.0242     | 0.00328    | 0.0257     | 0.00178    | 0.0447     | 0.00178    |
| 15          | 0.0116   | 0.00843    | 0.0208     | 0.002      | 0.00138    | 0.00229    | 0.0204     | 0.00241    | 0.0201     | 0.00408    | 0.0252     | 0.00245    | 0.0377     | 0.00247    |
| 16          | 0.0017   | 0.00789    | 0.0206     | 0.00148    | 0.00311    | 0.00126    | 0.0153     | 0.00206    | 0.0278     | 0.00314    | 0.0278     | 0.00186    | 0.0403     | 0.00242    |

**Table S4.** Climate variable trends (Tmp) and standard errors of the 17 study points for the CRU and RCP’s projection data. Note: 1539 mean 2015-2039 period and 7599 mean 2075-2099 period.

| City<br>Points | m(°C/yr) | std. error | m(°C/yr)   | std. error | m(°C/yr)   | std. error | m(°C/yr)   | std. error | m(°C/yr)   | std. error | m(°C/yr)   | std. error | m(°C/yr)   | std. error |
|----------------|----------|------------|------------|------------|------------|------------|------------|------------|------------|------------|------------|------------|------------|------------|
|                | TMP OBS  |            | RCP45 1539 |            | RCP45 7599 |            | RCP60 1539 |            | RCP60 7599 |            | RCP85 1539 |            | RCP85 7599 |            |
| 1              | 0.033    | 0.00641    | 0.0209     | 0.00345    | 0.0073     | 0.00336    | 0.0272     | 0.00483    | 0.0256     | 0.00692    | 0.032      | 0.00375    | 0.0476     | 0.00493    |
| 2              | 0.032    | 0.00644    | 0.0354     | 0.00422    | 0.00595    | 0.00512    | 0.0328     | 0.00661    | 0.0335     | 0.00748    | 0.0409     | 0.00501    | 0.0642     | 0.00726    |
| 3              | 0.0357   | 0.00721    | 0.0252     | 0.0023     | 0.0044     | 0.00269    | 0.0213     | 0.00294    | 0.0266     | 0.00376    | 0.0332     | 0.00296    | 0.0468     | 0.00255    |
| 4              | 0.0392   | 0.00795    | 0.0257     | 0.00132    | 0.00541    | 0.00197    | 0.0202     | 0.00257    | 0.0252     | 0.00321    | 0.0302     | 0.00218    | 0.0429     | 0.00259    |
| 5              | 0.0485   | 0.00895    | 0.0251     | 0.00152    | 0.00581    | 0.00195    | 0.0198     | 0.00305    | 0.0258     | 0.00329    | 0.0309     | 0.00227    | 0.0425     | 0.00235    |
| 6              | 0.0193   | 0.00663    | 0.0215     | 0.00205    | 0.00507    | 0.00271    | 0.0112     | 0.00244    | 0.022      | 0.00395    | 0.0295     | 0.00198    | 0.0422     | 0.00386    |
| 7              | 0.0189   | 0.00712    | 0.0231     | 0.00131    | 0.00611    | 0.00214    | 0.0122     | 0.00327    | 0.0216     | 0.00394    | 0.0255     | 0.00216    | 0.0443     | 0.00319    |
| 8              | 0.0187   | 0.00632    | 0.0237     | 0.00261    | 0.00561    | 0.00236    | 0.0208     | 0.00284    | 0.0316     | 0.00613    | 0.0361     | 0.00251    | 0.0616     | 0.00322    |
| 9              | 0.0268   | 0.00658    | 0.0232     | 0.00275    | 0.009      | 0.00239    | 0.0243     | 0.00334    | 0.0319     | 0.0046     | 0.0289     | 0.00204    | 0.0442     | 0.00358    |
| 10             | 0.0194   | 0.00678    | 0.0222     | 0.00284    | 0.0116     | 0.00464    | 0.0186     | 0.00449    | 0.0398     | 0.00835    | 0.0314     | 0.00219    | 0.0518     | 0.00279    |
| 11             | 0.0309   | 0.00653    | 0.022      | 0.00219    | 0.0081     | 0.00257    | 0.024      | 0.00381    | 0.0364     | 0.00593    | 0.0301     | 0.0026     | 0.0433     | 0.00274    |
| 12             | 0.0242   | 0.00646    | 0.0245     | 0.00228    | 0.00555    | 0.0033     | 0.0231     | 0.00276    | 0.0178     | 0.00494    | 0.0327     | 0.00307    | 0.0491     | 0.00295    |
| 13             | 0.0114   | 0.00903    | 0.0212     | 0.00156    | 0.0045     | 0.00159    | 0.0191     | 0.0021     | 0.0279     | 0.00304    | 0.0284     | 0.00229    | 0.0407     | 0.00198    |
| 14             | -0.00387 | 0.00802    | 0.0245     | 0.00216    | 0.00393    | 0.00173    | 0.0201     | 0.0025     | 0.0259     | 0.00423    | 0.0284     | 0.00222    | 0.045      | 0.00285    |
| 15             | 0.00135  | 0.00764    | 0.0215     | 0.00196    | 0.00299    | 0.00177    | 0.0168     | 0.00219    | 0.0234     | 0.00417    | 0.029      | 0.00217    | 0.0426     | 0.00337    |
| 16             | 0.0052   | 0.00616    | 0.021      | 0.0019     | 0.00455    | 0.00206    | 0.0152     | 0.0028     | 0.0273     | 0.00354    | 0.0318     | 0.00224    | 0.0423     | 0.00186    |

**Table S5.** Climate variable trends (Pre) and standard errors of the 17 study points for the CRU and RCP’s projection data. Note: 1539 mean 2015-2039 period and 7599 mean 2075-2099 period.

| City<br>Points | m(mm/yr) | std. error | m(mm/yr)   | std. error | m(mm/yr)  | std. error | m(mm/yr)  | std. error | m(mm/yr)  | std. error | m(mm/yr)  | std. error | m(mm/yr)  | std. error |
|----------------|----------|------------|------------|------------|-----------|------------|-----------|------------|-----------|------------|-----------|------------|-----------|------------|
|                | PRE OBS  |            | RCP45 1539 |            | RCP457599 |            | RCP601539 |            | RCP607599 |            | RCP857599 |            | RCP857599 |            |
| 1              | 0.0309   | 0.0188     | -0.00192   | 0.00345    | 0.000216  | 0.00307    | -0.000575 | 0.00607    | 0.00526   | 0.00511    | -0.00132  | 0.00366    | -0.0181   | 0.00434    |
| 2              | 0.0393   | 0.0251     | -0.00111   | 0.00351    | 0.00171   | 0.00303    | -0.00639  | 0.00606    | 0.00241   | 0.00627    | -0.00185  | 0.00409    | -0.0785   | 0.00482    |
| 3              | 0.0198   | 0.0117     | 0.000925   | 0.00264    | 0.00265   | 0.00286    | -0.00314  | 0.00332    | 0.00441   | 0.00397    | -0.00381  | 0.00277    | -0.105    | 0.00296    |
| 4              | 0.0356   | 0.0133     | 0.00373    | 0.00314    | 0.00362   | 0.00294    | -0.00414  | 0.00429    | -0.0039   | 0.00373    | -0.00039  | 0.00307    | -0.0731   | 0.00286    |
| 5              | 0.0253   | 0.0103     | 0.00334    | 0.00216    | 0.00486   | 0.00273    | -0.00576  | 0.00363    | 0.0043    | 0.00284    | 0.00166   | 0.00323    | -0.121    | 0.00237    |
| 6              | 0.00782  | 0.0444     | -0.00413   | 0.00507    | -0.00251  | 0.00592    | 0.00293   | 0.00792    | 0.00726   | 0.00687    | 0.00117   | 0.00458    | -0.0467   | 0.00481    |
| 7              | -0.0499  | 0.0276     | 0.00256    | 0.00479    | 0.0034    | 0.00626    | 0.00664   | 0.00749    | 0.0000516 | 0.00786    | -0.00471  | 0.00518    | -0.0828   | 0.0069     |
| 8              | -0.00998 | 0.0146     | -0.0003    | 0.00433    | 0.000572  | 0.00346    | 0.000789  | 0.0054     | -0.00485  | 0.00709    | -0.00348  | 0.00411    | -0.129    | 0.00406    |
| 9              | 0.0146   | 0.0205     | -0.000252  | 0.00424    | -0.000924 | 0.0038     | 0.00264   | 0.0052     | 0.00545   | 0.00467    | 0.00407   | 0.00412    | -0.072    | 0.00528    |
| 10             | 0.00508  | 0.0173     | 0.000871   | 0.00529    | -0.00171  | 0.00387    | -0.000515 | 0.00453    | 0.00844   | 0.00437    | 0.00107   | 0.00384    | -0.0808   | 0.00525    |
| 11             | 0.0333   | 0.028      | -0.00149   | 0.00376    | 0.000392  | 0.00287    | 0.0044    | 0.00351    | 0.00139   | 0.00481    | 0.00254   | 0.00352    | -0.0634   | 0.00459    |
| 12             | 0.0151   | 0.02       | 0.000032   | 0.00283    | 0.00198   | 0.00285    | -0.00476  | 0.00445    | 0.00742   | 0.00431    | -0.00202  | 0.00409    | -0.0754   | 0.0028     |
| 13             | 0.000135 | 0.0211     | -0.00721   | 0.0021     | 0.00375   | 0.00216    | 0.0000975 | 0.00649    | -0.00632  | 0.0057     | -0.00674  | 0.00314    | -0.142    | 0.00319    |
| 14             | 0.0361   | 0.0202     | -0.00323   | 0.00192    | 0.0023    | 0.00238    | -0.00153  | 0.00217    | -0.00119  | 0.00226    | -0.00209  | 0.0024     | -0.0792   | 0.00217    |
| 15             | 0.0553   | 0.0282     | -0.00234   | 0.00363    | -0.00042  | 0.00316    | 0.00259   | 0.00418    | -0.00351  | 0.00383    | -0.00406  | 0.00338    | -0.0896   | 0.0037     |
| 16             | 0.00667  | 0.0443     | -0.00128   | 0.00278    | 0.00145   | 0.00278    | 0.000696  | 0.00364    | -0.00246  | 0.00309    | -0.00354  | 0.00293    | -0.124    | 0.00308    |

**Table S6.** Historic trends comparison between City point and Spatial analysis.

| ID | Tmp (Spatial) |            | Tmp (City point) |            | Pre (Spatial) |            | Pre (City point) |            |
|----|---------------|------------|------------------|------------|---------------|------------|------------------|------------|
|    | m(°C/yr)      | std. error | m(°C/yr)         | std. error | m(mm/yr)      | std. error | m(mm/yr)         | std. error |
| 1  | 0.0232        | 0.00197    | 0.0235           | 0.00191    | 0.113         | 0.172      | 0.162            | 0.164      |
| 2  | 0.0213        | 0.00188    | 0.0215           | 0.0019     | 0.187         | 0.152      | 0.195            | 0.24       |
| 3  | 0.0196        | 0.00208    | 0.0196           | 0.00202    | 0.261         | 0.0893     | 0.265            | 0.0958     |
| 4  | 0.019         | 0.00203    | 0.0183           | 0.0022     | 0.243         | 0.106      | 0.248            | 0.117      |
| 5  | 0.0173        | 0.00253    | 0.0167           | 0.00259    | 0.178         | 0.0914     | 0.175            | 0.0905     |
| 6  | 0.0135        | 0.00236    | 0.0134           | 0.00224    | -0.224        | 0.187      | -0.0364          | 0.288      |
| 7  | 0.0165        | 0.00256    | 0.0155           | 0.0027     | -0.538        | 0.209      | -0.386           | 0.221      |
| 8  | 0.0188        | 0.00217    | 0.0192           | 0.00217    | -0.458        | 0.175      | -0.312           | 0.145      |
| 9  | 0.0236        | 0.00191    | 0.0236           | 0.00191    | -0.0743       | 0.19       | -0.064           | 0.195      |
| 10 | 0.0222        | 0.00191    | 0.0224           | 0.00202    | -0.0759       | 0.183      | -0.0657          | 0.163      |
| 11 | 0.0241        | 0.00185    | 0.0252           | 0.00191    | 0.051         | 0.199      | -0.0488          | 0.258      |
| 12 | 0.0218        | 0.00176    | 0.0217           | 0.00178    | 0.136         | 0.181      | 0.137            | 0.171      |
| 13 | 0.0206        | 0.00218    | 0.0207           | 0.00268    | 0.0957        | 0.127      | 0.215            | 0.18       |
| 14 | 0.0168        | 0.00254    | 0.017            | 0.00258    | 0.00666       | 0.219      | 0.0402           | 0.148      |
| 15 | 0.015         | 0.00239    | 0.0143           | 0.00238    | 0.263         | 0.182      | 0.64             | 0.236      |
| 16 | 0.0237        | 0.00213    | 0.0245           | 0.00212    | -0.0267       | 0.402      | -0.0681          | 0.328      |
| 17 | 0.015         | 0.00194    | 0.0144           | 0.00192    | 0.583         | 0.293      | 0.617            | 0.323      |
